# Supplementary material for: Molecular mechanism of antihistamines recognition and regulation of the histamine H1 receptor
Source: PubMed Central journal article supplement (PMC10762250; doi:10.1038/s41467-023-44477-4), 2024-01-02
Supplement: 41467_2023_44477_MOESM1_ESM.pdf [file 41467_2023_44477_MOESM1_ESM.pdf]

## **Supplementary Information for**

### **Molecular mechanism of antihistamines recognition and regulation of the histamine H<sub>1</sub> receptor**

Dandan Wang<sup>1#</sup>, Qiong Guo<sup>1#</sup>, Zhangsong Wu<sup>2#</sup>, Ming Li<sup>1</sup>, Binbin He<sup>1</sup>, Yang Du<sup>2</sup>, Kaiming Zhang<sup>1\*</sup>, Yuyong Tao<sup>1\*</sup>

<sup>#</sup>These authors contributed equally.

1. Department of Laboratory Medicine, The First Affiliated Hospital of USTC, MOE Key Laboratory for Membraneless Organelles and Cellular Dynamics, Hefei National Center for Cross-disciplinary Sciences, Biomedical Sciences and Health Laboratory of Anhui Province, Center for Advanced Interdisciplinary Science and Biomedicine of IHM, Division of Life Sciences and Medicine, University of Science and Technology of China, 230027 Hefei, P.R. China.

2. Kobilka Institute of Innovative Drug Discovery, School of Medicine, The Chinese University of Hong Kong, 518172, Shenzhen, Guangdong, China.

\*Correspondence: Yuyong Tao, [taoyy@ustc.edu.cn](mailto:taoyy@ustc.edu.cn); Kaiming Zhang, [kmzhang@ustc.edu.cn](mailto:kmzhang@ustc.edu.cn).

**Supplementary Figures 1-14**

**Supplementary Tables 1-3**

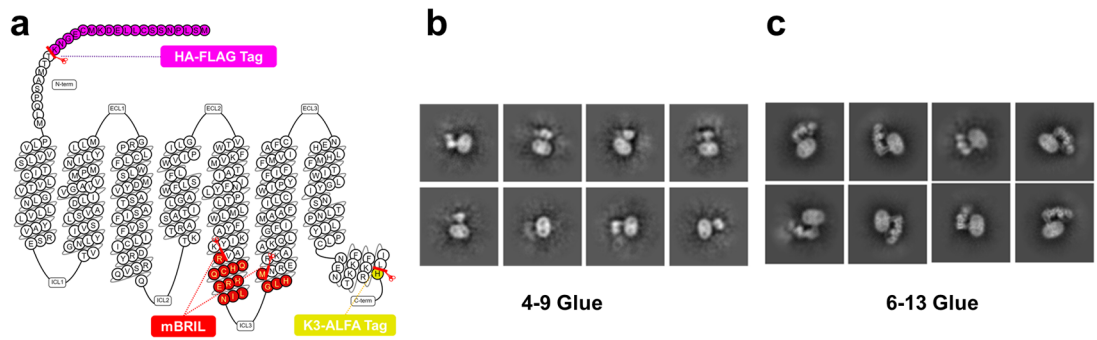

**Supplementary Fig. 1. The construct and glue molecule design of the H<sub>1</sub>R complex for structural determination.**

**a.** The construct of H<sub>1</sub>R for structural determination. Residues in purple, red, and yellow backgrounds were replaced with HA-FLAG tag, mBRIL, and K3-ALFA tag, respectively. **b, c.** Representative 2D classifications of 4-9 glue (**b**) and 6-13 glue samples (**c**). The 6-13 glue shows more desired particles.

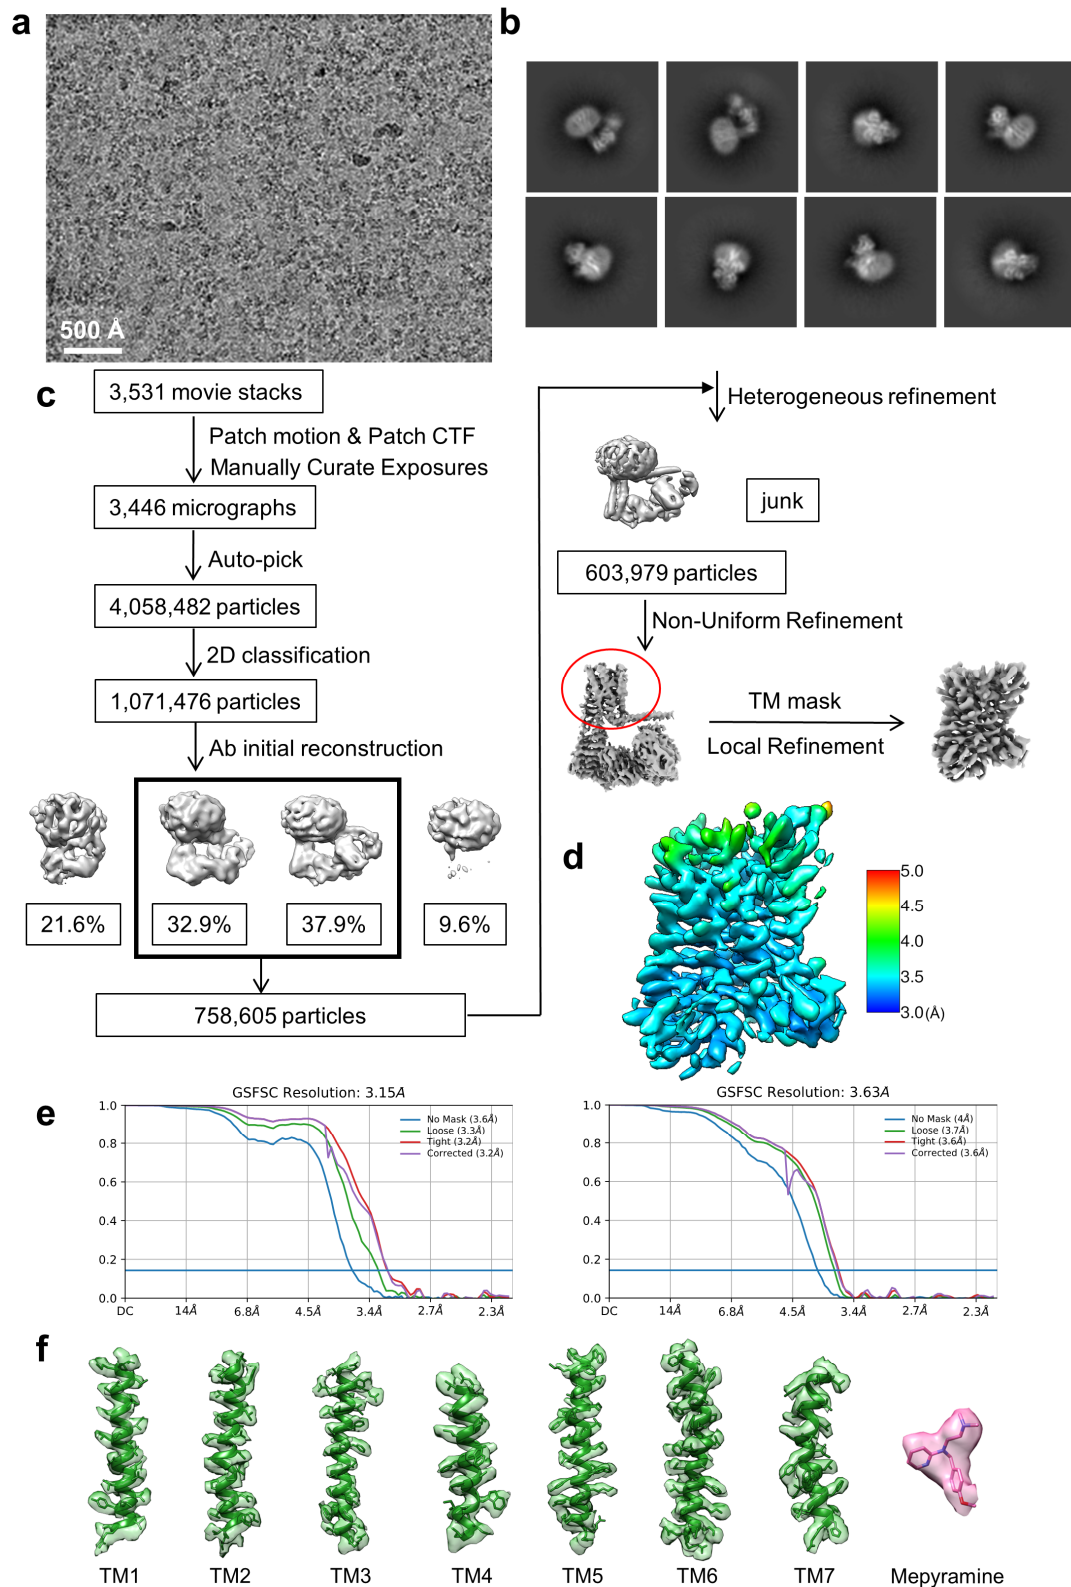

**Supplementary Fig. 2. Cryo-EM processing and 3D reconstruction workflow for the H<sub>1</sub>R-mepyramine complex.**

**a.** Representative motion-corrected cryo-EM micrograph. **b.** Reference-free 2D class averages. **c.** Workflow of the data processing. **d.** Resolution maps for the final 3D reconstruction of the TM region of H<sub>1</sub>R-Mepyramine. **e.** Gold standard FSC plots for the 3D reconstructions of the

whole map (left) and TM region (right), calculated in cryoSPARC. **f.** Cryo-EM density maps and models of the seven transmembrane helices (TM1-7) of H<sub>1</sub>R and mepyramine. Maps are shown in green and hot pink, respectively.

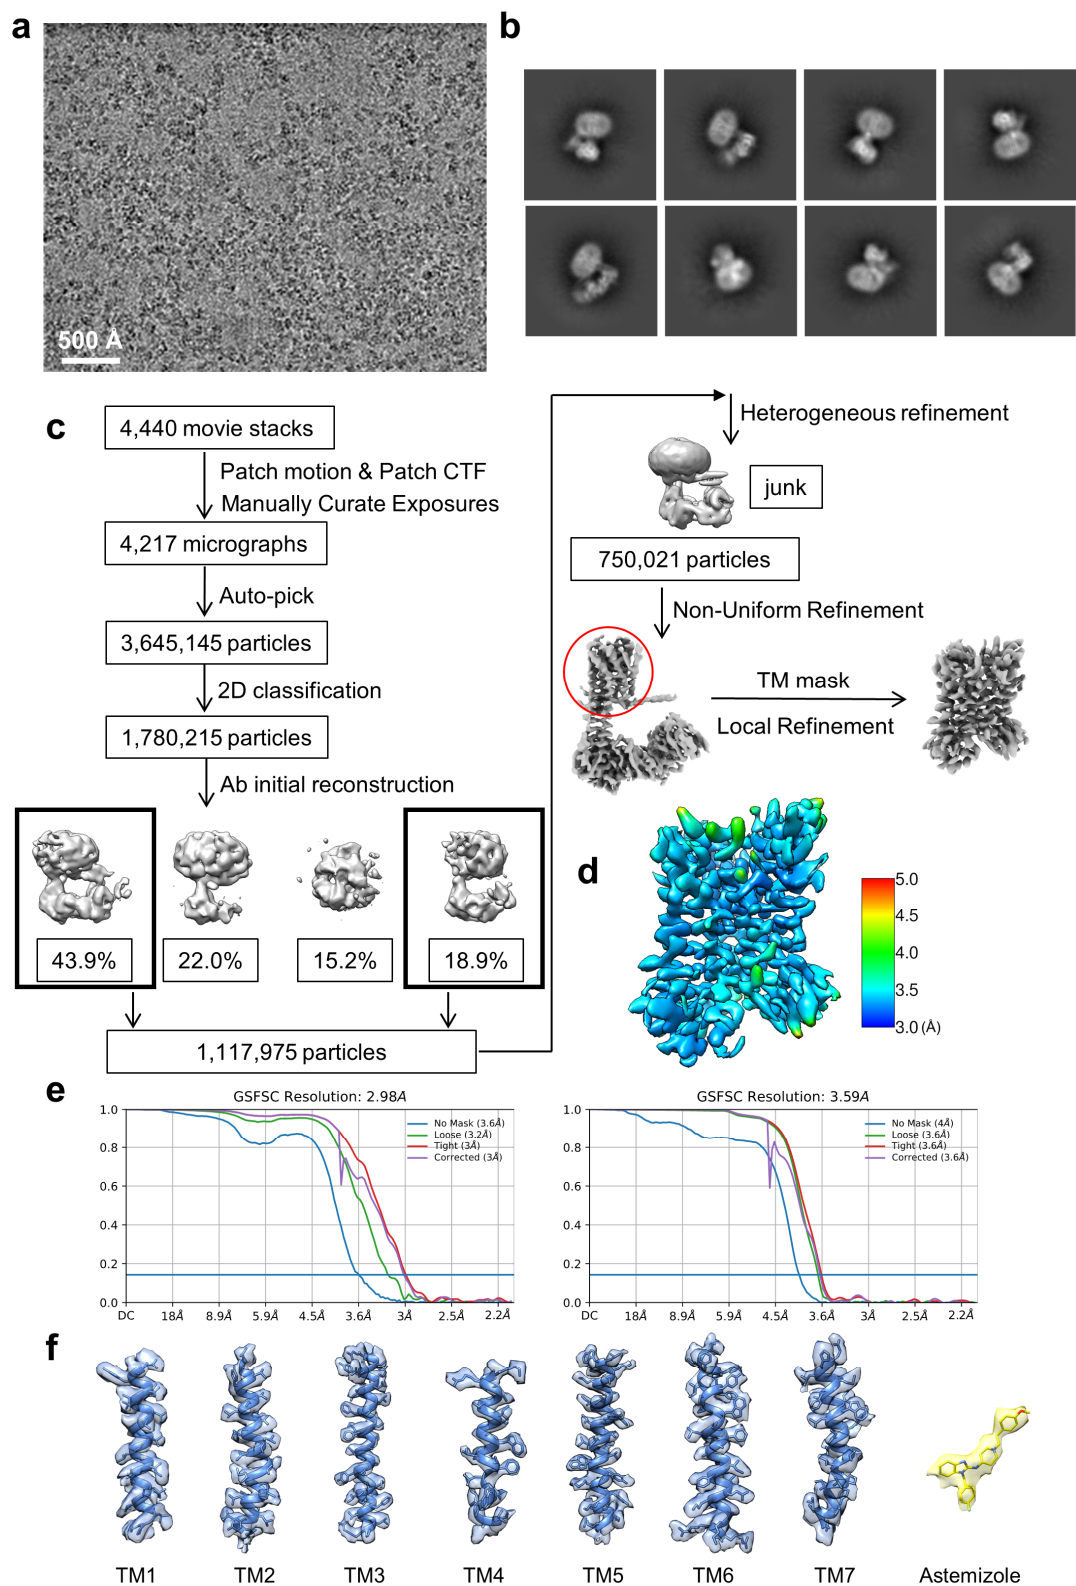

**Supplementary Fig. 3. Cryo-EM processing and 3D reconstruction workflow for the H<sub>1</sub>R-astemizole complex.**

**a.** Representative motion-corrected cryo-EM micrograph. **b.** Reference-free 2D class averages. **c.** Workflow of the data processing. **d.** Resolution maps for the final 3D reconstruction of the TM region of H<sub>1</sub>R-Astemizole. **e.** Gold standard FSC plots for the 3D reconstructions of the

whole map (left) and TM region (right), calculated in cryoSPARC. **f.** Cryo-EM density maps and models of the seven transmembrane helices (TM1-7) of H<sub>1</sub>R and astemizole. Maps are shown in sky blue and pale yellow, respectively.

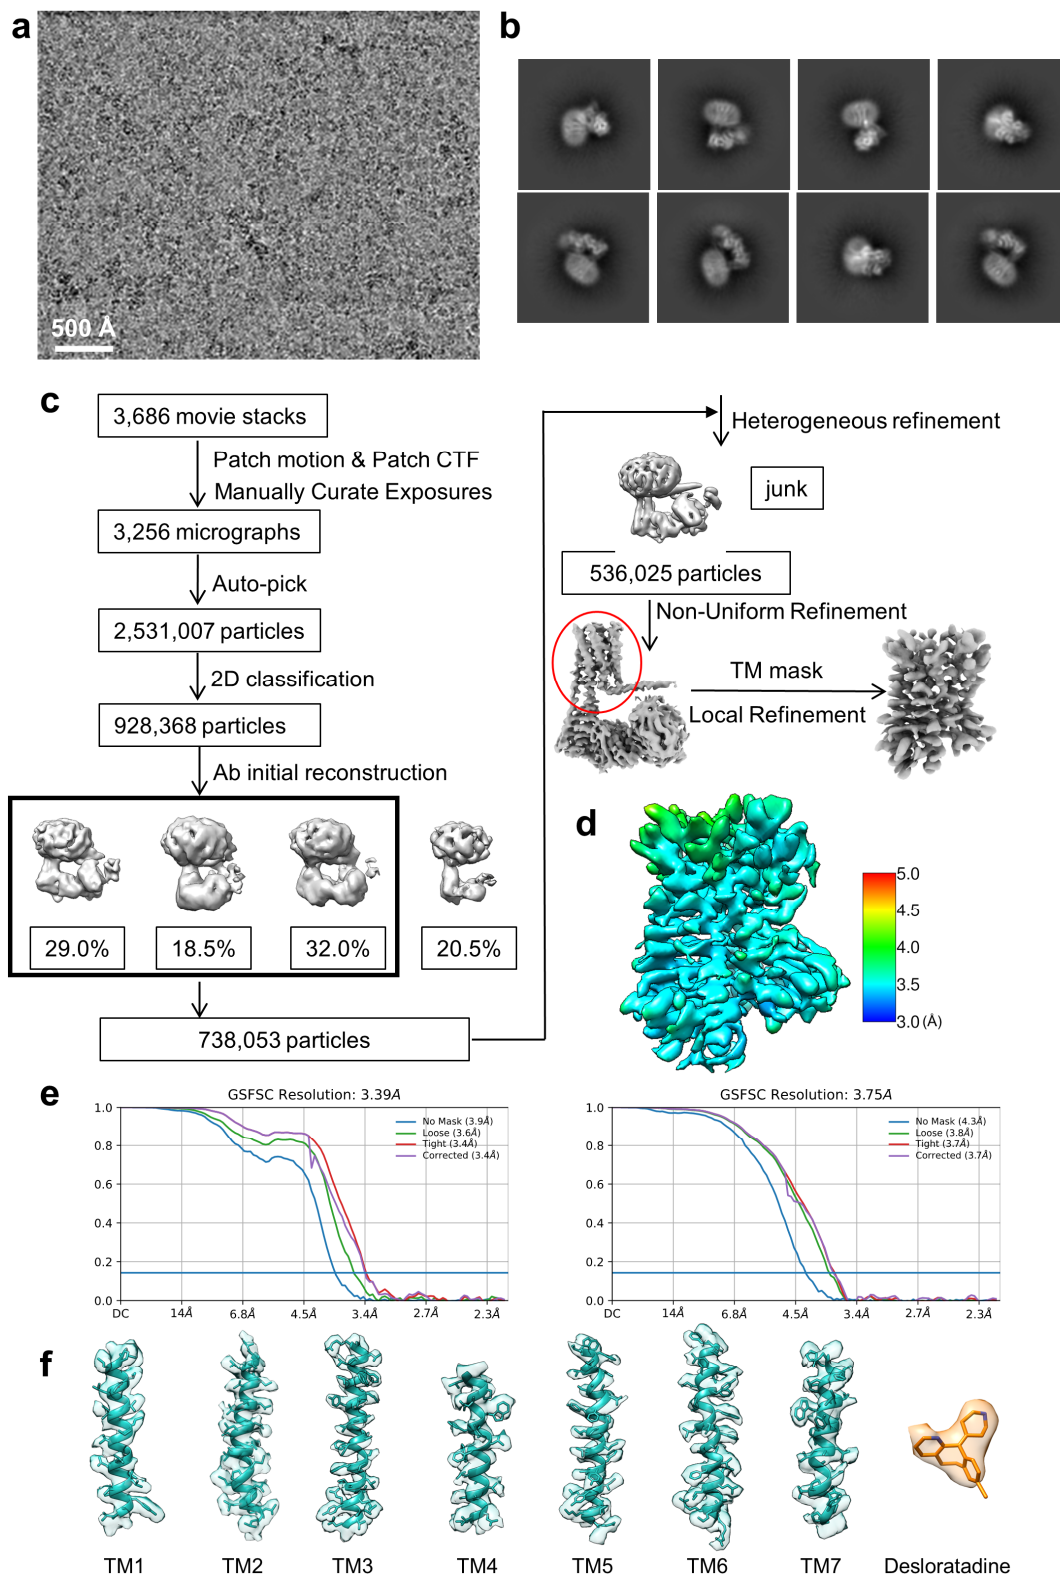

**Supplementary Fig. 4. Cryo-EM processing and 3D reconstruction workflow for the H<sub>1</sub>R-desloratadine complex.**

**a.** Representative motion-corrected cryo-EM micrograph. **b.** Reference-free 2D class averages. **c.** Workflow of the data processing. **d.** Resolution maps for the final 3D reconstruction of the TM region of H<sub>1</sub>R-desloratadine. **e.** Gold standard FSC plots for the 3D reconstructions of the

whole map (left) and TM region (right), calculated in cryoSPARC. **f.** Cryo-EM density maps and models of the seven transmembrane helices (TM1-7) of H<sub>1</sub>R and desloratadine. Maps are shown in cyan and orange, respectively.



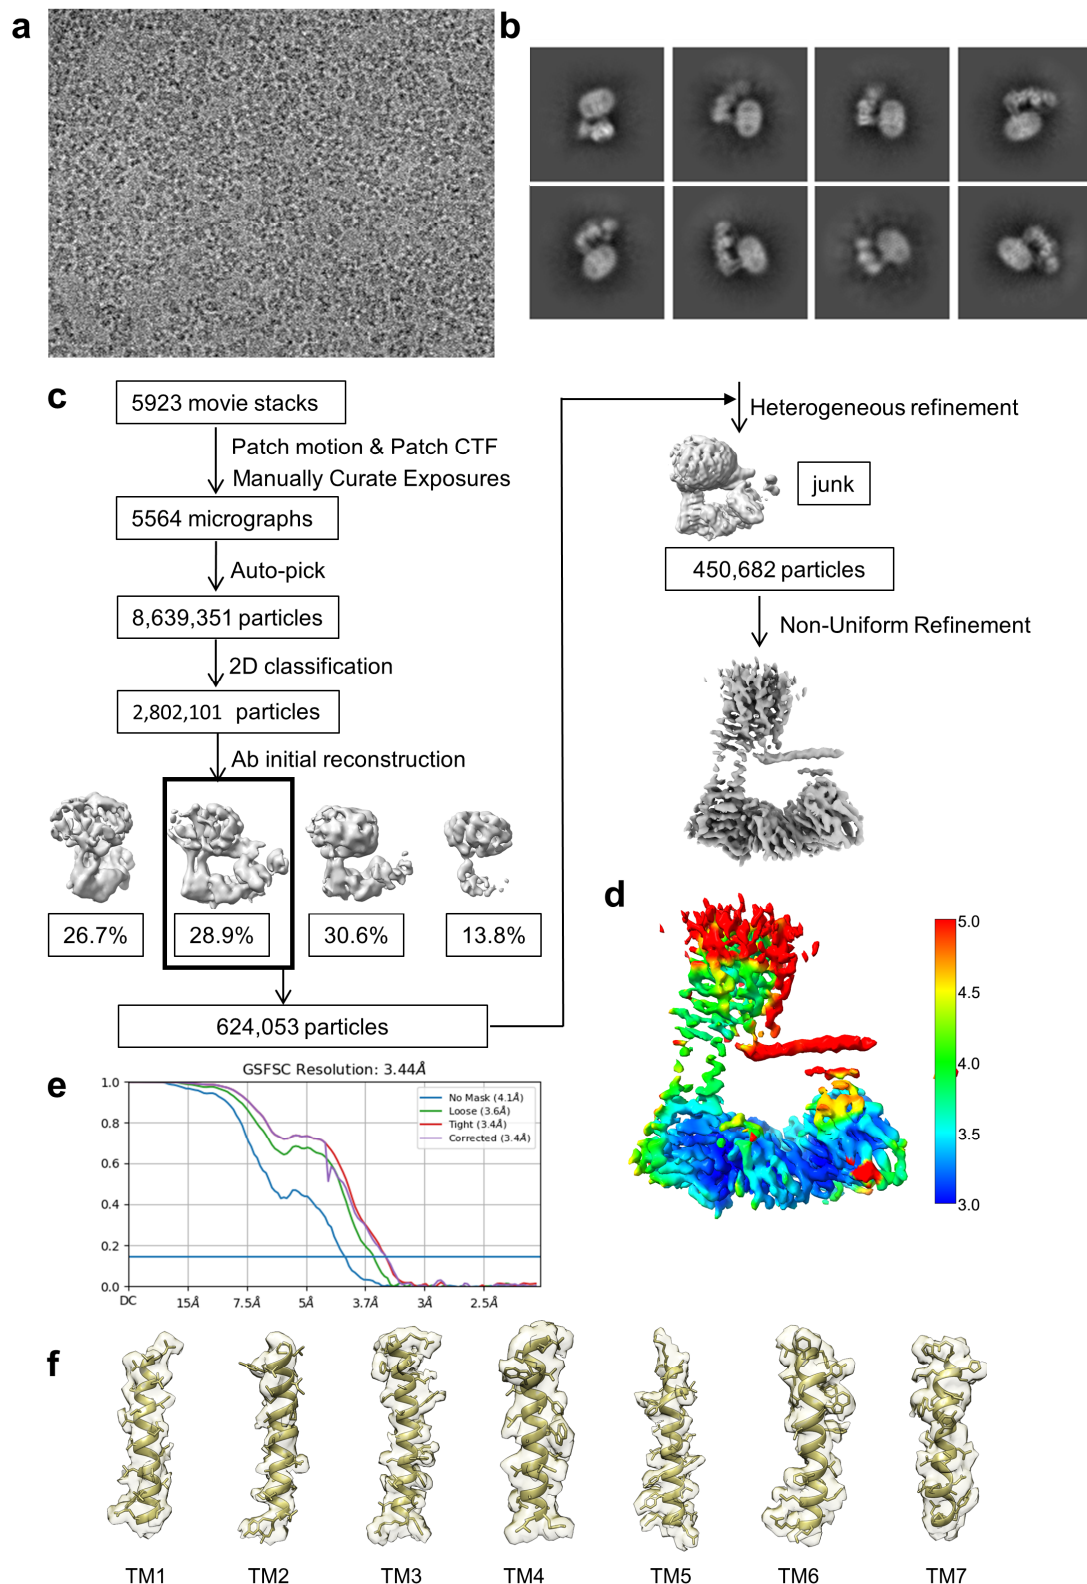

**Supplementary Fig. 5. Cryo-EM processing and 3D reconstruction workflow for H<sub>1</sub>R in apo form.**

**a.** Representative motion-corrected cryo-EM micrograph. **b.** Reference-free 2D class averages. **c.** Workflow of the data processing. **d.** Resolution maps for the final 3D reconstruction of H<sub>1</sub>R in apo form. **e.** Gold standard FSC plots for the 3D reconstructions of the whole map,

calculated in cryoSPARC. **f.** Cryo-EM density maps and models of the seven transmembrane helices (TM1-7) of H<sub>1</sub>R in apo form. Maps are shown in olive.

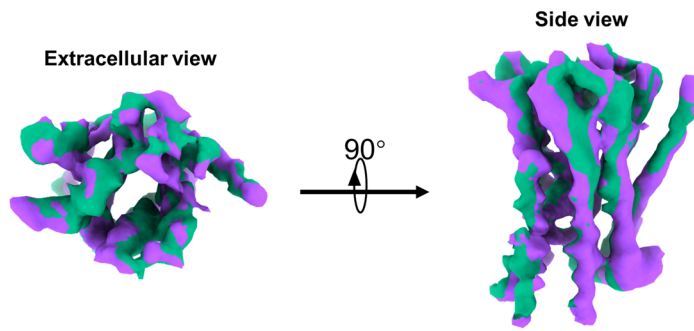

**Supplementary Fig. 6. Structural dynamics in apo H<sub>1</sub>R.**

Two density maps reconstituted from two classes were shown in the 3D variability analysis.

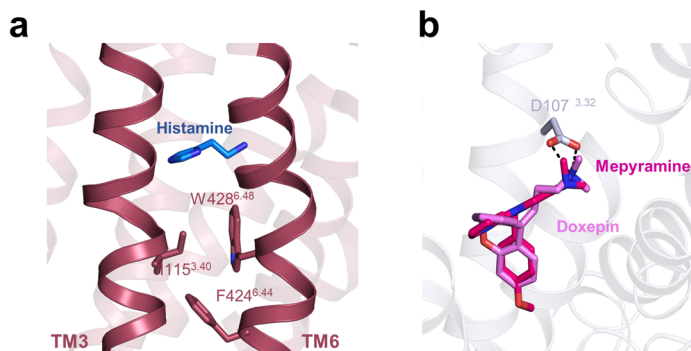

**Supplementary Fig. 7. The binding site of histamine and doxepin.**

**a.** The binding site of histamine is above the toggle switch W428<sup>6.48</sup> and P<sup>5.50</sup>-I<sup>3.40</sup>-F<sup>6.44</sup> triadmotif (PDB ID: 7DFL). Histamine and H<sub>1</sub>R color as marine and raspberry, respectively. **b.** Comparison of the mepyramine-H<sub>1</sub>R complex and doxepin-H<sub>1</sub>R complex (PDB ID: 3RZE). Doxepin and H<sub>1</sub>R are colored violet and gray, respectively. Mepyramine (hot pink) adopts a pose similar to doxepin. Hydrogen bonds are marked as black dashed lines.

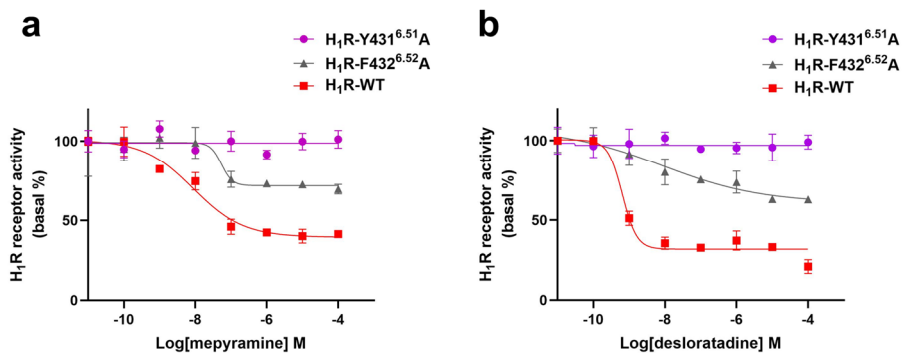

**Supplementary Fig. 8. The functional assays in the main binding pocket by mepyramine and desloratadine.**

Dose-dependent responses of mepyramine (**a**) and desloratadine(**b**) measured by cellular IP1 accumulation assays in wild-type and mutant H<sub>1</sub>R. Data represented as the mean  $\pm$  SEM, n=3 independent samples.

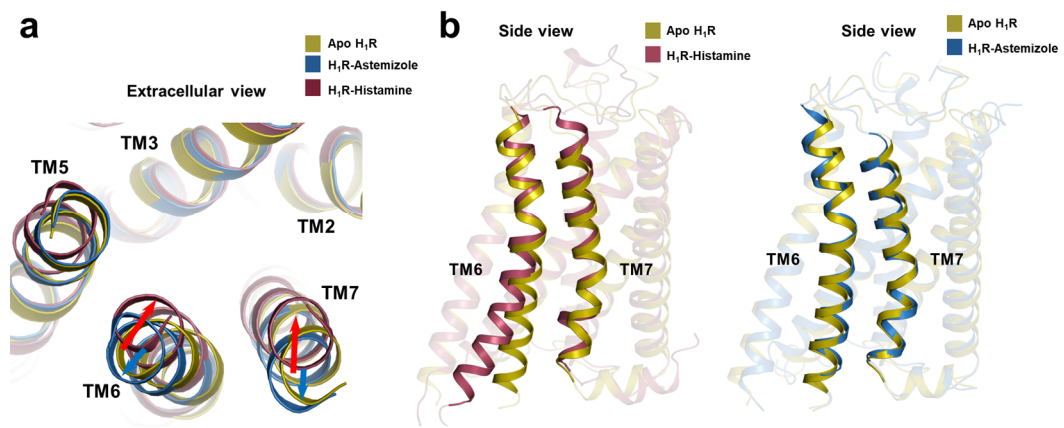

**Supplementary Fig. 9. Conformational states of TM6 and TM7 in different structures.**  
 Close-up of the TM6 and TM7 structures in apo, histamine-bound (PDB ID: 7DFL) and astemizole-bound structures in top view (a) and side view (b).

### H<sub>1</sub>R first-generation antihistamines

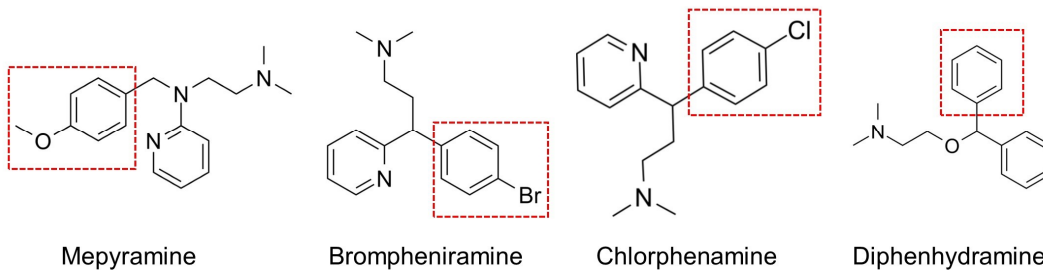

### H<sub>1</sub>R second-generation antihistamines

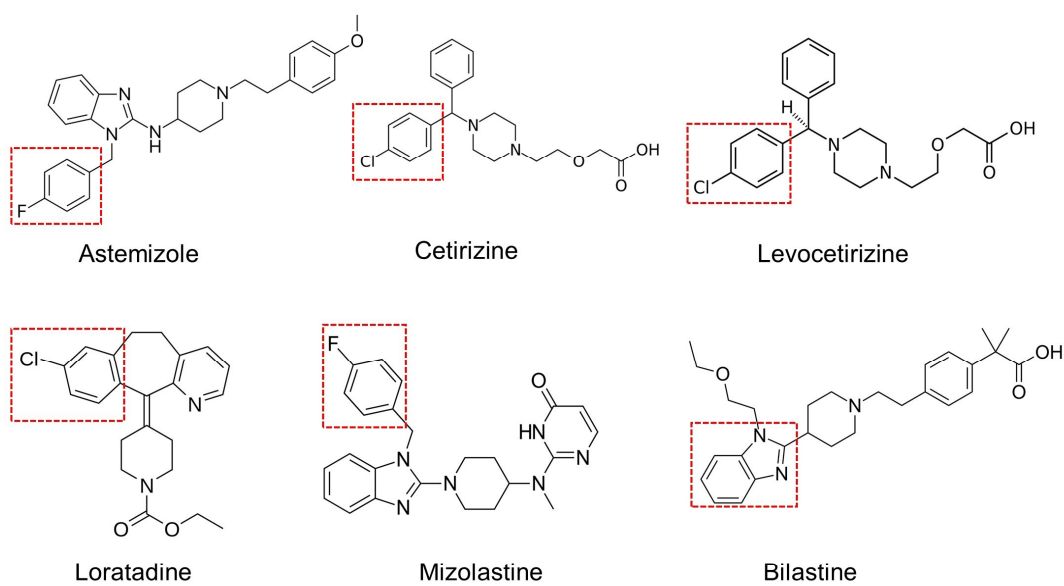

### H<sub>1</sub>R new second-generation antihistamines

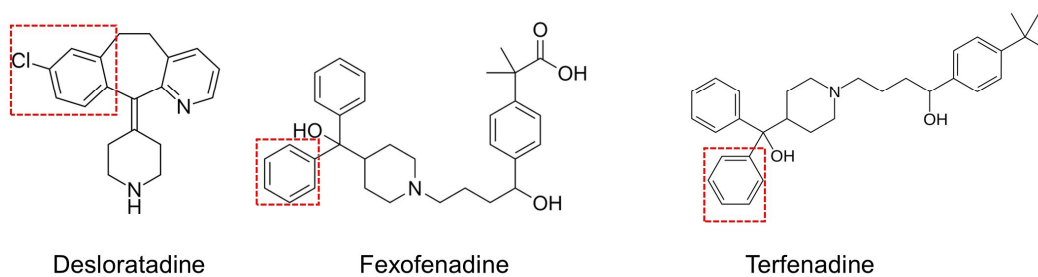

### Supplementary Fig. 10. Chemical structures of H<sub>1</sub>R antihistamines.

All H<sub>1</sub>R antihistamines contain a phenyl group, which is labeled with a red square. Thirteen representative H<sub>1</sub>R antihistamines are shown.

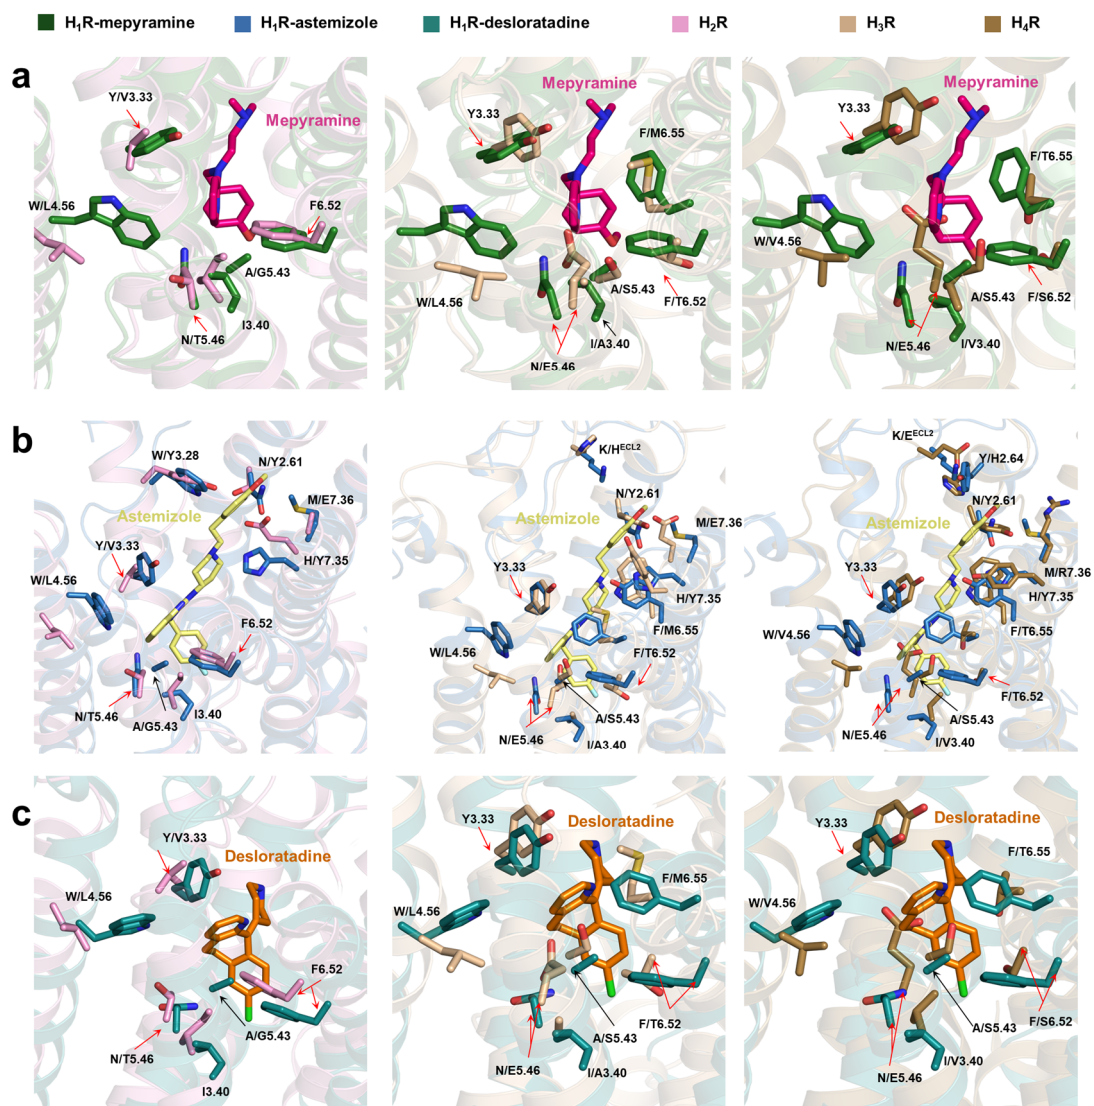

**Supplementary Fig. 11. Structural comparison of the ligand pockets in four histamine receptors.**

Structural comparison of the H<sub>1</sub>R ligand-binding pocket bound to mepyramine (a) and desloratadine (c) with those from H<sub>2</sub>R, H<sub>3</sub>R and H<sub>4</sub>R. H<sub>1</sub>R-mepyramine color as forest, H<sub>1</sub>R-astemizole color as sky blue, H<sub>1</sub>R-desloratadine color as deep teal, H<sub>2</sub>R color as pink (PDB ID: 7UL3), H<sub>3</sub>R color as wheat (PDB ID: 7F61) and H<sub>4</sub>R color as sand (alphafold model). Varied residues in different subtype receptors are highlighted with arrows.



| Ballesteros-Weinstein |                     |      |      |      |      |      |      |      |      |      |      |      |      |      |                          |      |      |      |      |
|-----------------------|---------------------|------|------|------|------|------|------|------|------|------|------|------|------|------|--------------------------|------|------|------|------|
|                       | Main binding pocket |      |      |      |      |      |      |      |      |      |      |      |      |      | Secondary binding pocket |      |      |      |      |
|                       | 3.32                | 3.33 | 3.37 | 3.40 | 4.56 | ECL2 | 5.43 | 5.46 | 5.47 | 6.44 | 6.48 | 6.51 | 6.52 | 6.55 | 2.61                     | 2.64 | 3.28 | 7.35 | 7.36 |
| H <sub>1</sub> R      | D107                | Y108 | T112 | I115 | W158 | K179 | A195 | N198 | F199 | F424 | W428 | Y431 | F432 | F435 | N84                      | Y87  | W103 | H450 | M451 |
| H <sub>2</sub> R      | D                   | V    | T    | I    | L    | K    | G    | T    | F    | F    | W    | Y    | F    | F    | S                        | Y    | Y    | E    | A    |
| H <sub>3</sub> R      | D                   | Y    | T    | A    | L    | H    | S    | E    | F    | F    | W    | Y    | T    | M    | Y                        | Y    | W    | Y    | E    |
| H <sub>4</sub> R      | D                   | Y    | T    | V    | V    | E    | S    | E    | F    | F    | W    | Y    | S    | T    | Y                        | H    | W    | Y    | M    |
| α <sub>1A</sub> AR    | D                   | V    | T    | I    | I    | I    | A    | S    | F    | F    | W    | F    | F    | M    | S                        | F    | W    | F    | K    |
| α <sub>2A</sub> AR    | D                   | V    | T    | I    | I    | R    | C    | S    | F    | F    | W    | F    | F    | Y    | S                        | N    | Y    | F    | K    |
| D <sub>1</sub>        | D                   | I    | T    | I    | I    | N    | S    | S    | F    | F    | W    | F    | F    | N    | K                        | A    | W    | F    | D    |
| β <sub>1</sub>        | D                   | V    | T    | I    | V    | C    | S    | S    | F    | F    | W    | F    | F    | N    | G                        | I    | W    | F    | V    |
| β <sub>2</sub>        | D                   | V    | T    | I    | T    | C    | S    | S    | F    | F    | W    | F    | F    | N    | G                        | H    | W    | Y    | I    |
| 5-HT <sub>2A</sub>    | D                   | V    | T    | I    | I    | S    | S    | S    | F    | F    | W    | F    | F    | N    | S                        | T    | W    | L    | N    |
| M <sub>1</sub>        | D                   | Y    | N    | V    | L    | Q    | A    | A    | F    | F    | W    | Y    | N    | N    | Y                        | Y    | W    | W    | E    |

**Supplementary Fig. 12. Sequence comparison of the residues from the main and secondary pocket in H<sub>1</sub>R-related receptors.**

H<sub>1</sub>R residues in the main and secondary pockets are compared with equivalent residues from other histamine receptor and aminergic receptors, the conserved residues are colored with orange background. H<sub>2</sub>R: histamine H<sub>2</sub> receptor, H<sub>3</sub>R: histamine H<sub>3</sub> receptor, H<sub>4</sub>R: histamine H<sub>4</sub> receptor, α<sub>1A</sub>AR: α<sub>1A</sub> adrenergic receptors, α<sub>2A</sub>AR: α<sub>2A</sub> adrenergic receptors, D<sub>1</sub>: dopamine receptors, β<sub>1-2</sub>: β<sub>1-2</sub> adrenergic receptors, 5-HT<sub>2A</sub>: serotonin 5-HT<sub>2A</sub> receptors, M<sub>1</sub>: M<sub>1</sub> muscarinic acetylcholine receptors.

## H<sub>2</sub>R antagonist

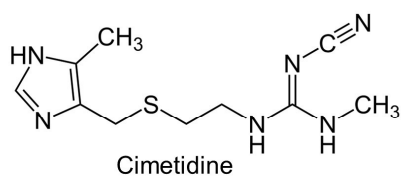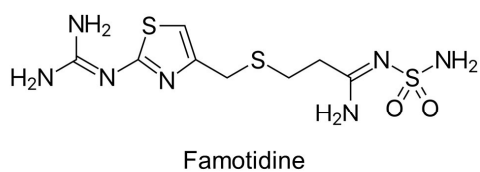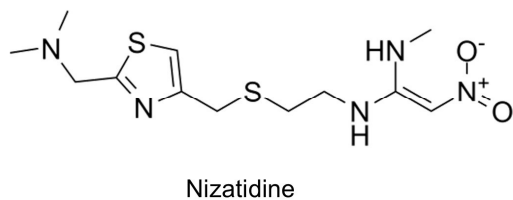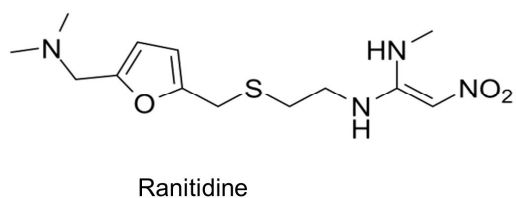

## H<sub>3</sub>R antagonist

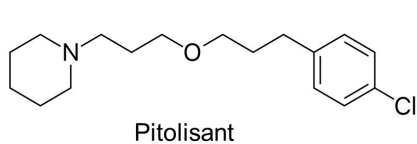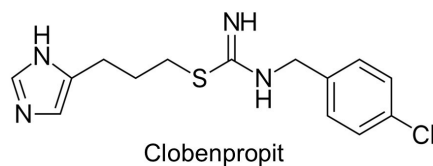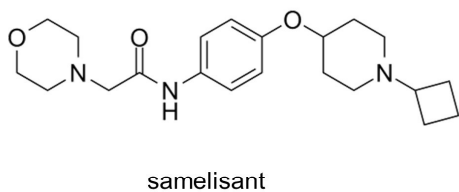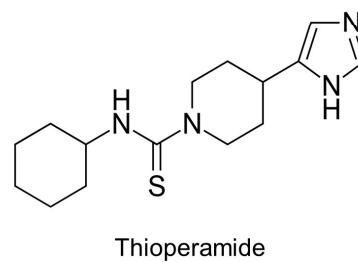

## H<sub>4</sub>R antagonist

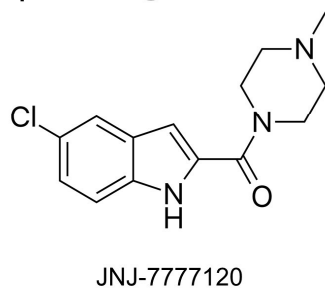

**Supplementary Fig. 13. Chemical structures of H<sub>2</sub>R, H<sub>3</sub>R and H<sub>4</sub>R antagonists.**  
Four representative antagonists of H<sub>2</sub>R and H<sub>3</sub>R and one antagonist of H<sub>4</sub>R are shown.

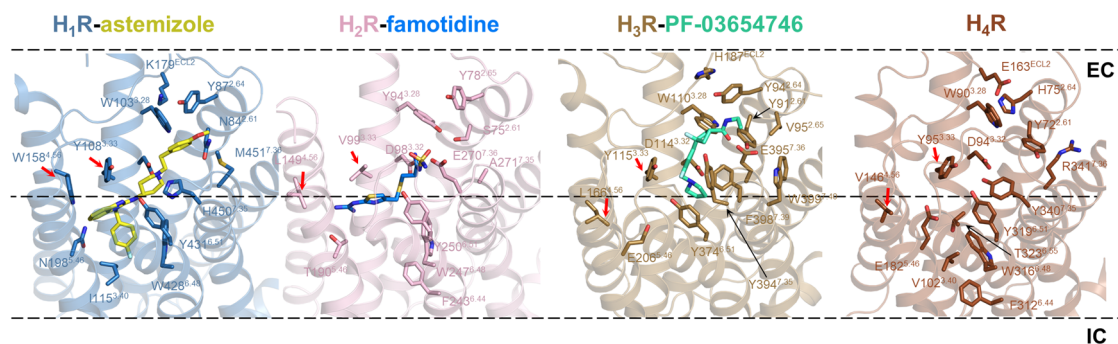

**Supplementary Fig. 14. Comparison of the ligand binding positions in H<sub>1</sub>R, H<sub>2</sub>R, H<sub>3</sub>R and H<sub>4</sub>R.**

Superpositions of the structures of H<sub>1</sub>R-astemizole (H<sub>1</sub>R in skyblue, astemizole in paleyellow), H<sub>2</sub>R-famotidine (PDB: 7UL3, H<sub>2</sub>R in lightpink, famotidine in lightblue), H<sub>3</sub>R-PF-03654746 (PDB: 7F61, H<sub>3</sub>R in sand, PF-03654746 in greenscyan) and H<sub>4</sub>R (alphafold model) from the membrane view. The binding positions are clearly different.

**Supplementary Table 1. Cryo-EM data collection, model refinement and validation statistics.**

| <b>Data collection/<br/>processing</b>                 | <b>apo<br/>H<sub>1</sub>R-mBRIL</b> | <b>Mepyramine-<br/>H<sub>1</sub>R-mBRIL</b> | <b>Astemizole-<br/>H<sub>1</sub>R-mBRIL</b> | <b>Desloratadine-<br/>H<sub>1</sub>R-mBRIL</b> |
|--------------------------------------------------------|-------------------------------------|---------------------------------------------|---------------------------------------------|------------------------------------------------|
| PDB ID                                                 | 8X5X                                | 8X63                                        | 8X5Y                                        | 8X64                                           |
| Magnification                                          | 81000                               | 81000                                       | 81000                                       | 81000                                          |
| Voltage (kV)                                           | 300                                 | 300                                         | 300                                         | 300                                            |
| Electron<br>exposure (e <sup>-</sup> /Å <sup>2</sup> ) | 50                                  | 50                                          | 50                                          | 50                                             |
| Defocus range<br>(μm)                                  | -1.2~-2.0                           | -1.2~-2.0                                   | -1.2~-2.0                                   | -1.2~-2.0                                      |
| Pixel size (Å)                                         | 0.535                               | 0.535                                       | 0.535                                       | 0.535                                          |
| Symmetry<br>imposed                                    | C1                                  | C1                                          | C1                                          | C1                                             |
| Initial particle<br>projections (no.)                  | 8639351                             | 4058482                                     | 3645145                                     | 2531007                                        |
| Final particle<br>projections (no.)                    | 450682                              | 603979                                      | 750021                                      | 536025                                         |
| Map resolution<br>(Å)                                  | 3.5                                 | 3.2                                         | 3.0                                         | 3.4                                            |
| FSC threshold                                          | 0.143                               | 0.143                                       | 0.143                                       | 0.143                                          |
| <b>Refinement</b>                                      |                                     |                                             |                                             |                                                |
| Initial model<br>used (PDB code)                       | 3RZE                                | 3RZE                                        | 3RZE                                        | 3RZE                                           |
| Model resolution<br>(Å)                                | 4.1                                 | 4.0                                         | 3.8                                         | 4.2                                            |
| FSC threshold                                          | 0.5                                 | 0.5                                         | 0.5                                         | 0.5                                            |
| Model resolution<br>range (Å)                          | 50-3.1                              | 50-3.1                                      | 50-3.1                                      | 50-3.1                                         |
| Map sharpening<br>B factor (Å <sup>2</sup> )           | -128.7                              | -121                                        | -132                                        | -124.6                                         |
| Model<br>composition                                   |                                     |                                             |                                             |                                                |
| Non-hydrogen<br>atoms                                  | 2107                                | 2254                                        | 2294                                        | 2191                                           |
| Protein residues                                       | 256                                 | 270                                         | 274                                         | 263                                            |
| Ligand                                                 |                                     | 1                                           | 1                                           | 1                                              |
| B factors (Å <sup>2</sup> )                            |                                     |                                             |                                             |                                                |
| Protein                                                | 98.50                               | 19.07                                       | 95.82                                       | 71.15                                          |
| Ligand                                                 |                                     | 14.45                                       | 101.80                                      | 81.17                                          |
| R.m.s. deviations                                      |                                     |                                             |                                             |                                                |
| Bond lengths (Å)                                       | 0.003                               | 0.005                                       | 0.004                                       | 0.005                                          |
| Bond angles (°)                                        | 0.739                               | 0.733                                       | 0.775                                       | 0.782                                          |

|                      |       |       |       |       |
|----------------------|-------|-------|-------|-------|
| Validation           |       |       |       |       |
| MolProbity score     | 1.76  | 1.98  | 1.92  | 2.10  |
| Clash core           | 10.98 | 9.42  | 8.42  | 13.29 |
| Rotamer outliers (%) | 0.00  | 0.00  | 0.40  | 0.00  |
| Ramachandran plot    |       |       |       |       |
| Favored (%)          | 96.75 | 92.05 | 92.54 | 92.55 |
| Allowed (%)          | 3.25  | 7.95  | 7.46  | 7.45  |

**Supplementary Table 2. Activities of different antihistamines for the wild-type and mutated H<sub>1</sub>R in the IP1 assays.**

IC<sub>50</sub> and Emax estimates represent the average and standard error of mean (SEM) from n=3 independent samples. Emax is defined as percentage of maximum response. N.D. represents no detectable. N.A. represents not available.

| H <sub>1</sub> R | Mepyramine            |            | Astemizole            |             | Mizolastine           |            | Desloratadine         |            | Loratadine            |            |
|------------------|-----------------------|------------|-----------------------|-------------|-----------------------|------------|-----------------------|------------|-----------------------|------------|
|                  | IC <sub>50</sub> (nM) | Emax (%)   | IC <sub>50</sub> (nM) | Emax (%)    | IC <sub>50</sub> (nM) | Emax (%)   | IC <sub>50</sub> (nM) | Emax (%)   | IC <sub>50</sub> (nM) | Emax (%)   |
| <b>WT</b>        | 14.42±8.69            | 58.56±2.24 | 16.56±5.06            | 52.38±6.46  | 3.84±0.79             | 51.68±19.4 | 0.52±0.1              | 79.06±5    | 351.5±13.89           | 64.39±2.53 |
| <b>Y87A</b>      | N.A.                  | N.A.       | 69.97±29.65           | 40.99±6.4   | N.A.                  | N.A.       | N.A.                  | N.A.       | N.A.                  | N.A.       |
| <b>W103A</b>     | N.A.                  | N.A.       | 165.19±137.21         | 41.97±12.27 | N.A.                  | N.A.       | N.A.                  | N.A.       | N.A.                  | N.A.       |
| <b>K179Y</b>     | N.A.                  | N.A.       | 31.14±10.63           | 76.99±0.98  | N.A.                  | N.A.       | N.A.                  | N.A.       | N.A.                  | N.A.       |
| <b>Y431A</b>     | N.D.                  | N.D.       | N.A.                  | N.A.        | N.A.                  | N.A.       | N.D.                  | N.D.       | N.A.                  | N.A.       |
| <b>F432A</b>     | 53.91±34.9            | 30.31±6.93 | N.A.                  | N.A.        | N.A.                  | N.A.       | 13.1±11.86            | 37.05±7.27 | N.A.                  | N.A.       |
| <b>H450A</b>     | N.A.                  | N.A.       | 59.29±23.09           | 71.21±9.27  | 5.14±0.13             | 36.1±4.94  | N.A.                  | N.A.       | N.A.                  | N.A.       |

**Supplementary Table 3. The top three docking results of mizolastine and loratadine.**

| <b>Mizolastine</b> |                     |                      |            | <b>Loratadine</b> |                     |                      |            |
|--------------------|---------------------|----------------------|------------|-------------------|---------------------|----------------------|------------|
| Mode               | Affinity (kcal/mol) | dist. From best mode |            | Mode              | Affinity (kcal/mol) | dist. From best mode |            |
|                    |                     | rmsd l. b.           | rmsd u. b. |                   |                     | rmsd l. b.           | rmsd u. b. |
| 1                  | -9.0                | 0                    | 0          | 1                 | -7.7                | 0                    | 0          |
| 2                  | -8.8                | 3.999                | 9.499      | 2                 | -6.6                | 4.332                | 8.862      |
| 3                  | -8.6                | 1.646                | 2.012      | 3                 | -5.9                | 4.587                | 8.552      |
